# Supplementary material for: Human Herpesvirus-6 and -7 in the Brain Microenvironment of Persons with Neurological Pathology and Healthy People
Source: PubMed Central journal article supplement (PMC7956495; doi:10.3390/ijms22052364), 2021-02-27
Supplement: ijms-22-02364-s001.pdf [file ijms-22-02364-s001.pdf]

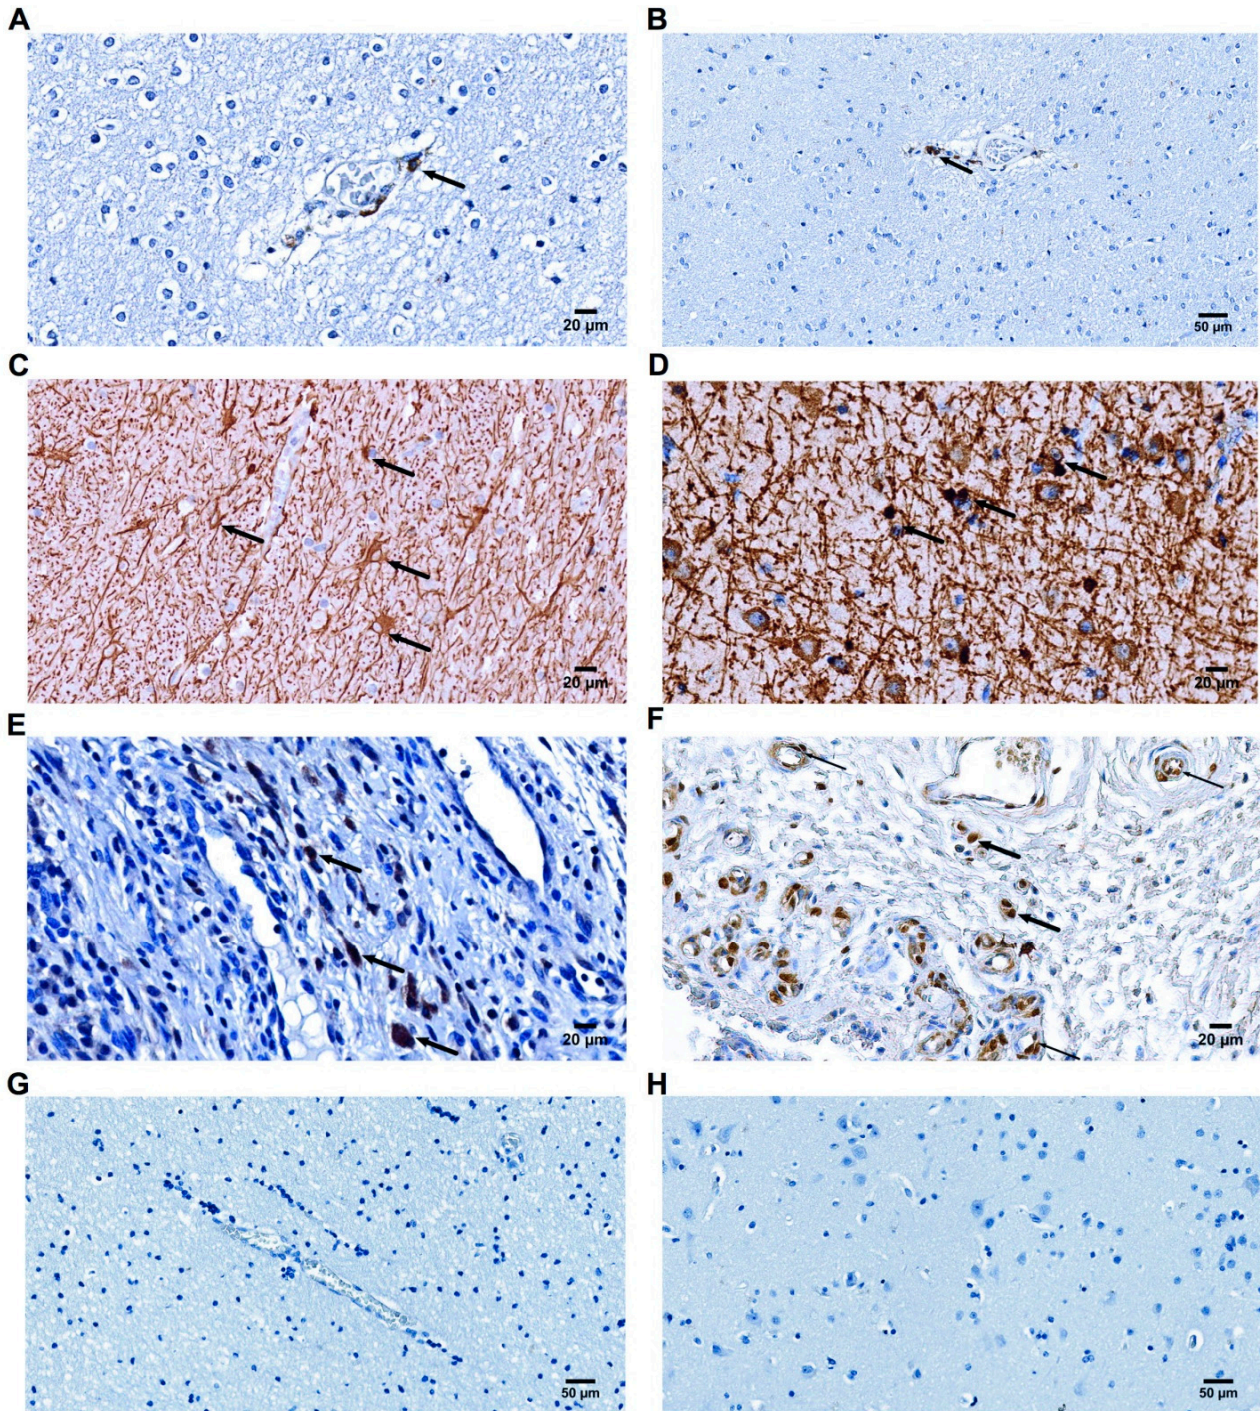

Figure S1. Representative microphotographs of IHC. (A) CD4 immunoreactivity observed in the temporal white matter of HHV+ individual (arrow),  $\times 400$ ; (B) CD8 immunoreactivity observed in the frontal white matter of HHV+ individual (arrow),  $\times 200$ ; (C) GFAP immunopositivity in the astrocytes (arrows), temporal gray matter,  $\times 400$ ; (D) MBP immunopositivity in the oligodendrocytes (arrows), temporal gray matter,  $\times 400$ . (E) Immunoreactivity observed in the synovial stroma of HHV-6+ subject with an osteoarthritis: HHV-6+ macrophages (arrows),  $\times 400$ . (F) Immunoreactivity observed in the synovial stroma of HHV-7+ subject with a rheumatoid arthritis: HHV-7+ macrophages (thick arrows) and vascular endotheliocytes (narrow arrows),  $\times 400$ . (G) HHV-6 negative control, frontal white matter,  $\times 200$ ; (H) HHV-7 negative control, temporal gray matter,  $\times 200$ .
